# Supplementary material for: Oxygen-supplied mesoporous carbon nanoparticles for enhanced photothermal/photodynamic synergetic therapy against antibiotic-resistant bacterial infections
Source: Royal Society of Chemistry journal article supplement (doi:10.1039/d2sc01740g), 2022-01-01
Supplement: d2sc01740g1.pdf [file d2sc01740g1.pdf]

Electronic Supplementary Material (ESI) for Chemical Science.

This journal is © The Royal Society of Chemistry 2022

## Electronic Supplementary Material

### Oxygen-Supplied Mesoporous Carbon Nanoparticles for Enhanced Photothermal/ Photodynamic Synergetic Therapy of Antibiotic-Resistant Bacterial Infection

Jiamei Zhou,<sup>a</sup> Wenjie Wang,<sup>b</sup> Qiuyang Zhang,<sup>a</sup> Zijun Zhang,<sup>a</sup> Jiangna Guo,<sup>a,\*</sup> Feng Yan<sup>a,\*</sup>

<sup>a</sup>Jiangsu Engineering Laboratory of Novel Functional Polymeric Materials, College of Chemistry, Chemical Engineering and Materials Science, Soochow University, Suzhou, 215123, China

<sup>b</sup>Hematology Center, Cyrus Tang Medical Institute, Soochow University, Suzhou, 215123, China

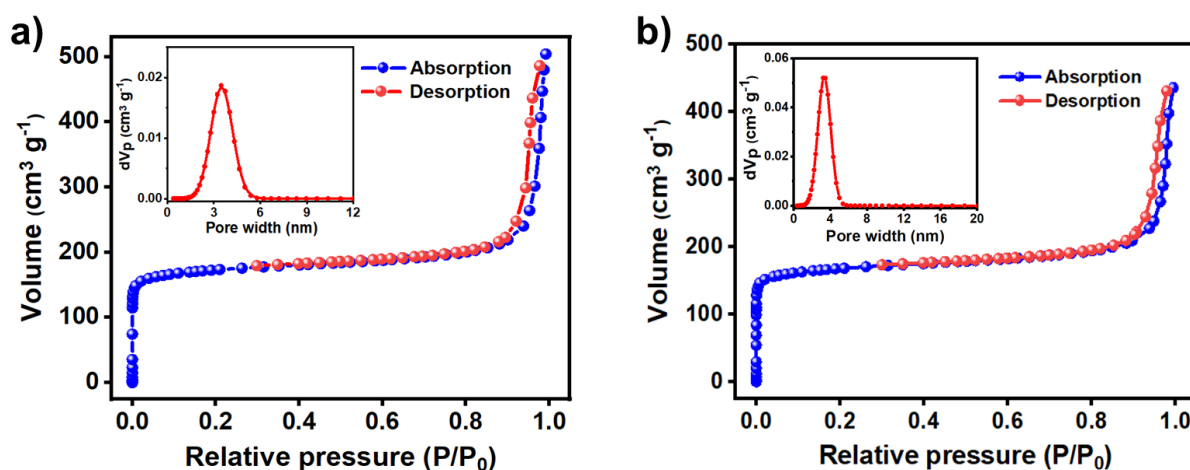

**Fig. S1** N<sub>2</sub> desorption-adsorption isotherms at 77 K and pore size distribution (inset) curves of  
a) MCN, b) OMCN.

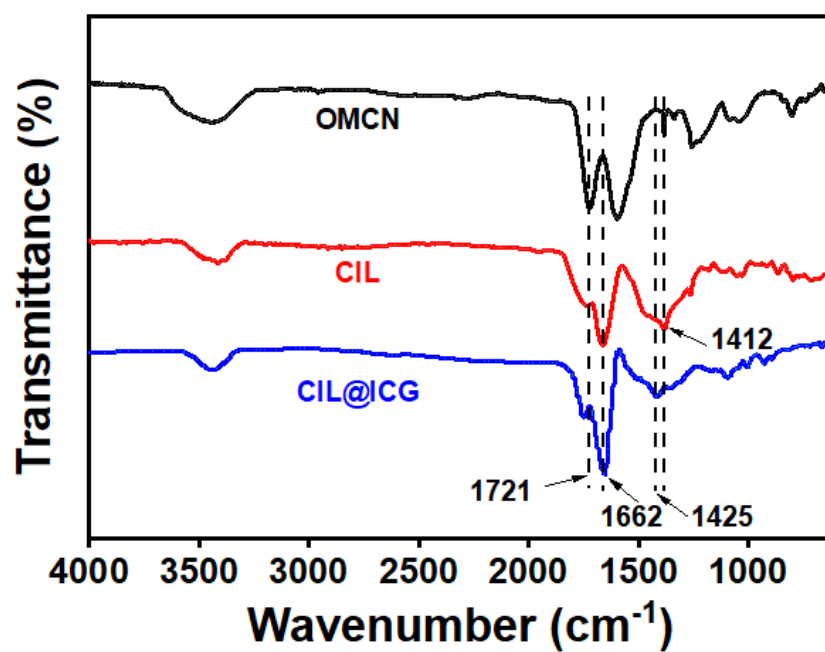

**Fig. S2** FT-IR spectra of OMCN, CIL and CIL@ICG.

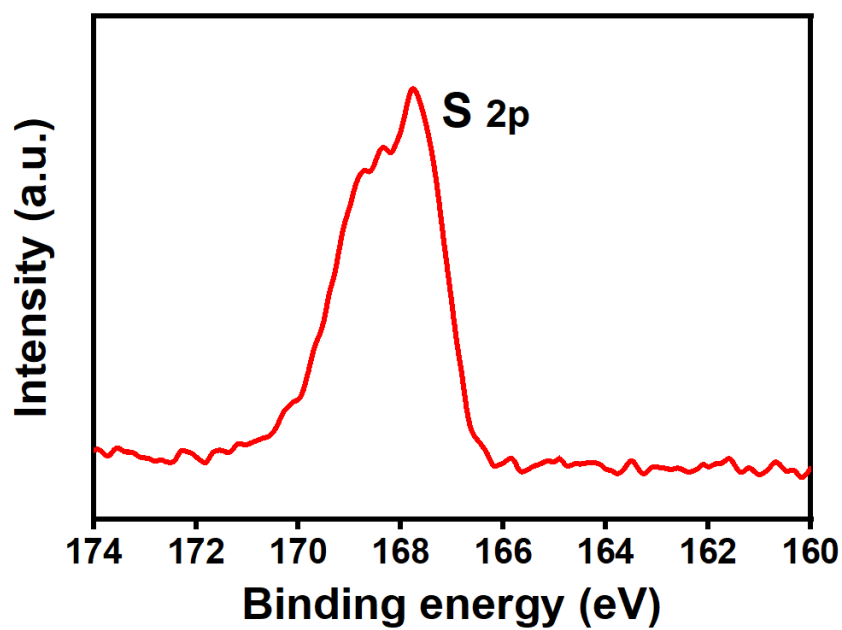

**Fig. S3** High-resolution XPS spectrum of S 2p of CIL@ICG.

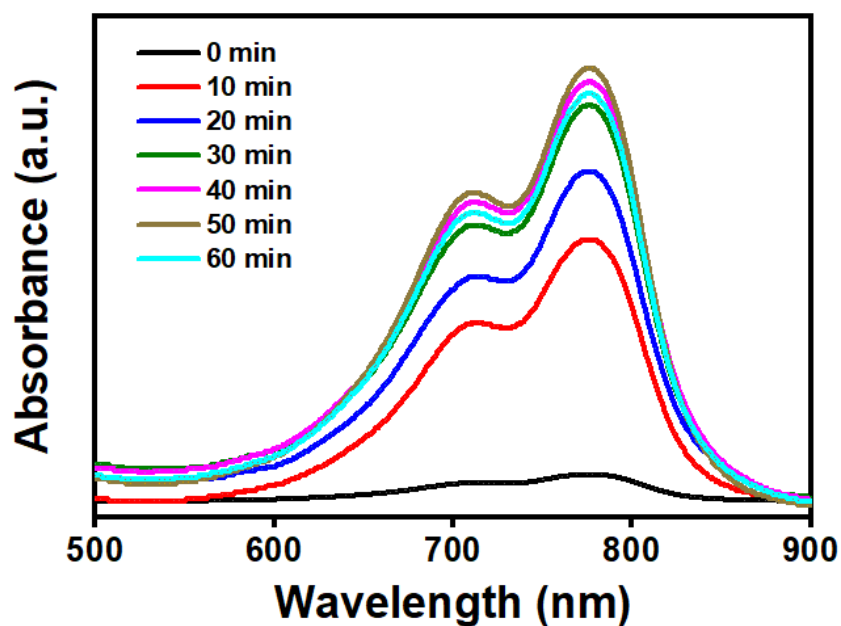

**Fig. S4** Release profiles of ICG from CIL@ICG in PBS (pH=7.4). The stability of CIL@ICG was evaluated by monitoring the absorbance of the released ICG from CIL@ICG in PBS suspension at different time.

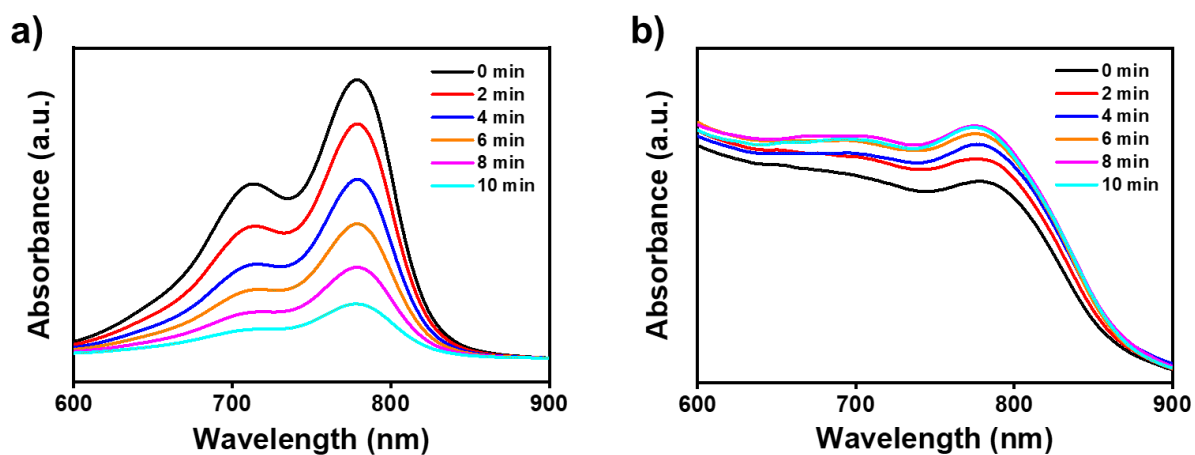

**Fig. S5** UV-vis-NIR absorption spectra of a) free ICG aqueous solution and b) CIL@ICG/PFH@O<sub>2</sub> dispersion irradiated with 808 nm NIR laser (808 nm, 1 W cm<sup>-2</sup>) for different time.

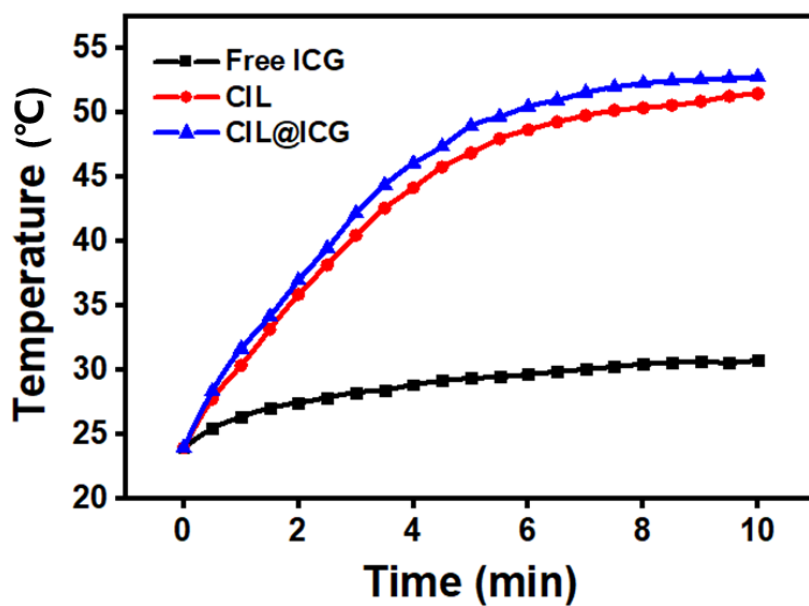

**Fig. S6** Time-temperature profiles of 100  $\mu\text{g mL}^{-1}$  CIL, CIL@ICG suspension and equivalent concentration of free ICG solution under NIR laser irradiation (808 nm, 1 W  $\text{cm}^{-2}$ ).

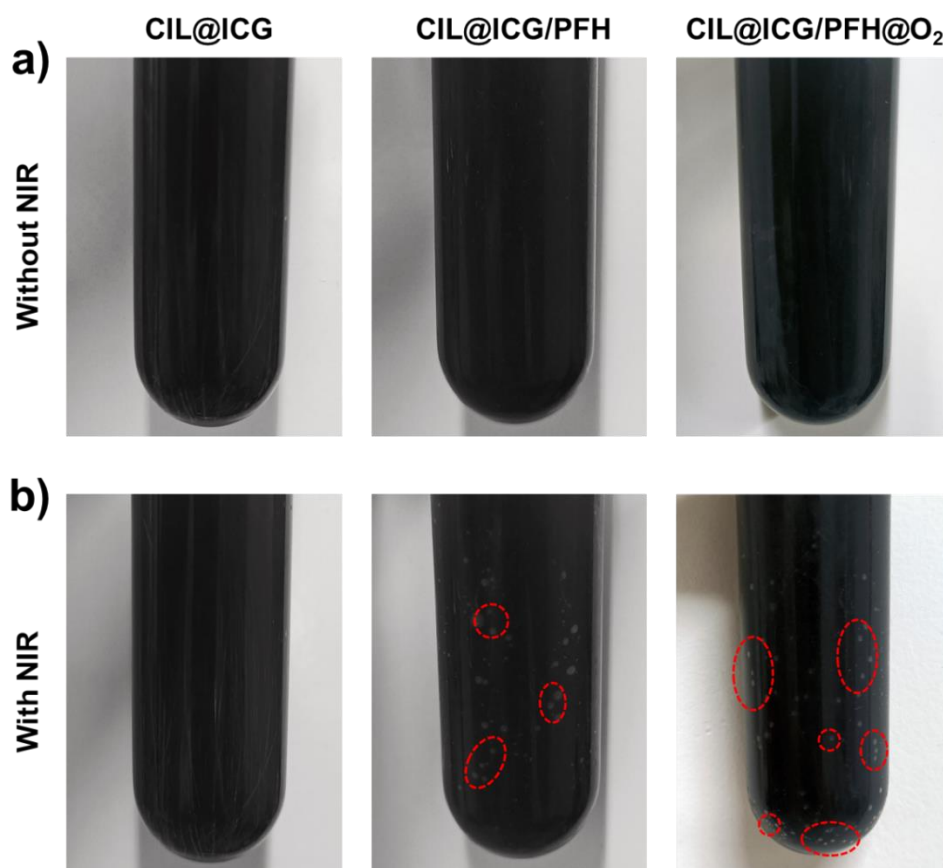

**Fig. S7** Photographs of CIL@ICG, CIL@ICG/PFH and CIL@ICG/PFH@O<sub>2</sub> dispersion a) with and b) without of 808 nm NIR irradiation (5 min).

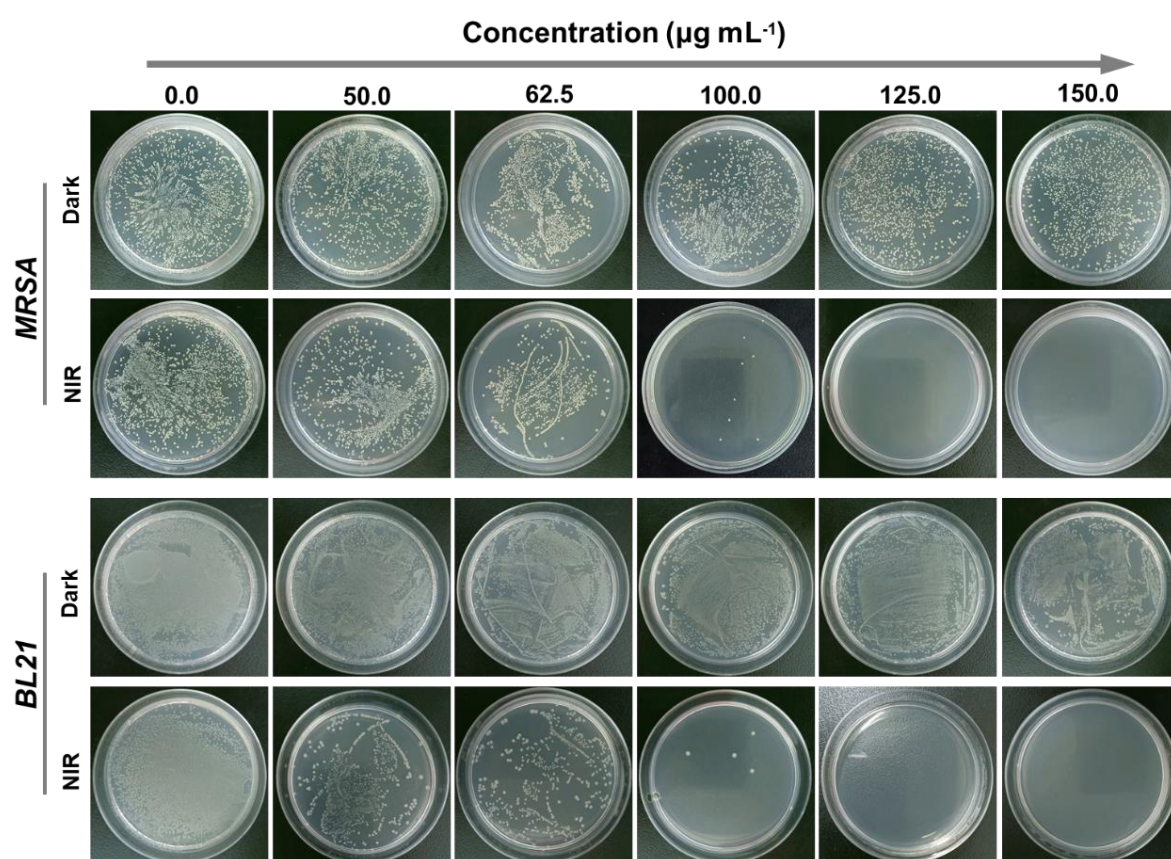

**Fig. S8** Colony plate photographs of MRSA and BL21 mixed with a series of concentrations of CIL@ICG/PFH@O<sub>2</sub> with or without NIR irradiation (1 W cm<sup>-2</sup>, 5 min).

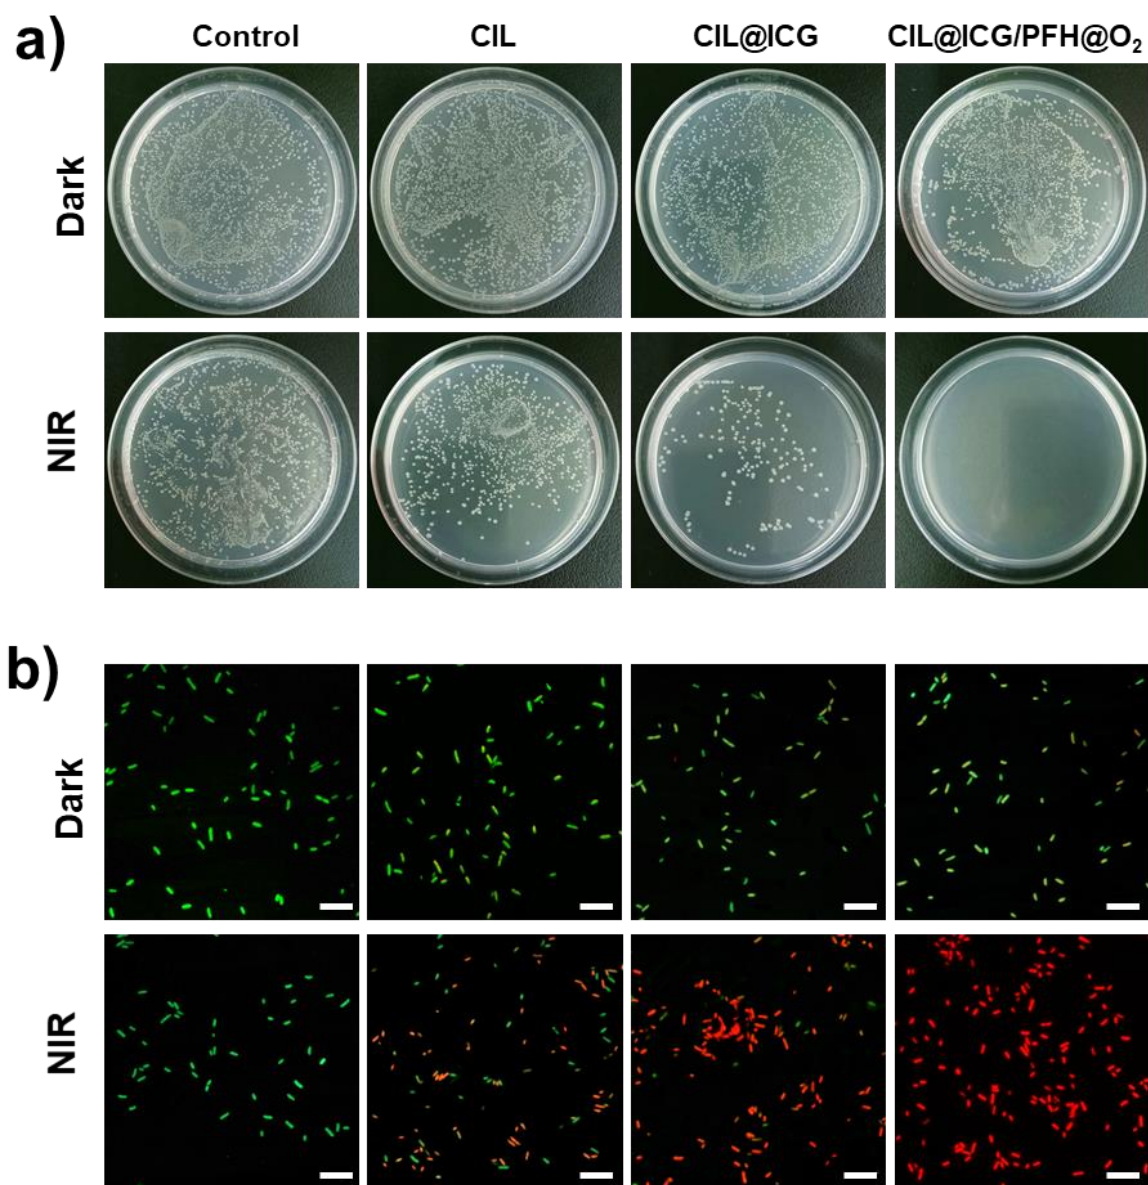

**Fig. S9** a) Plate diffusion results and b) Live/dead fluorescence staining images of BL21 co-cultured with  $100 \mu\text{g mL}^{-1}$  CIL, CIL@ICG and CIL@ICG/PFH@O<sub>2</sub> with/without 808 nm NIR irradiation. Red and green fluorescence represent dead and viable bacteria, respectively. Laser irradiation conditions:  $1 \text{ W cm}^{-2}$ , 5 min. Scale bar:  $8 \mu\text{m}$ .

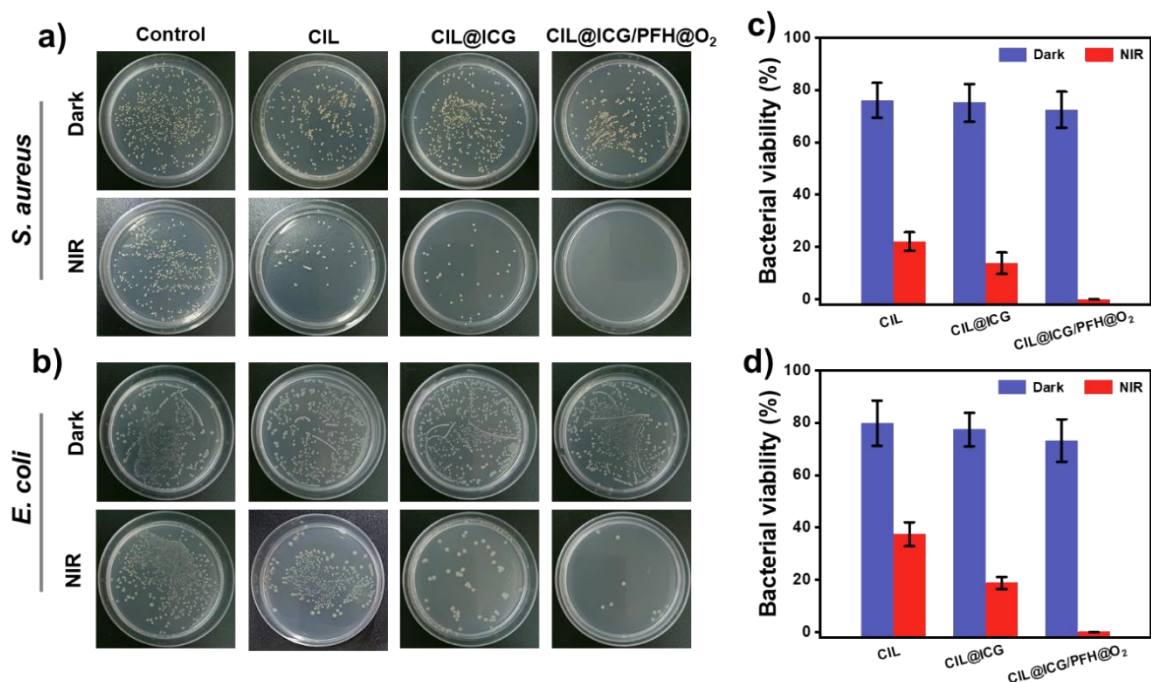

**Fig. S10** Plate diffusion results of a) *S. aureus* and b) *E. coli* mixed with 100  $\mu\text{g mL}^{-1}$  of CIL, CIL@ICG and CIL@ICG/PFH@O<sub>2</sub>, exposed to NIR irradiation or kept in dark. Corresponding bacterial viabilities of c) *S. aureus* and d) *E. coli*. Laser irradiation conditions: 1 W cm<sup>-2</sup>, 5 min.

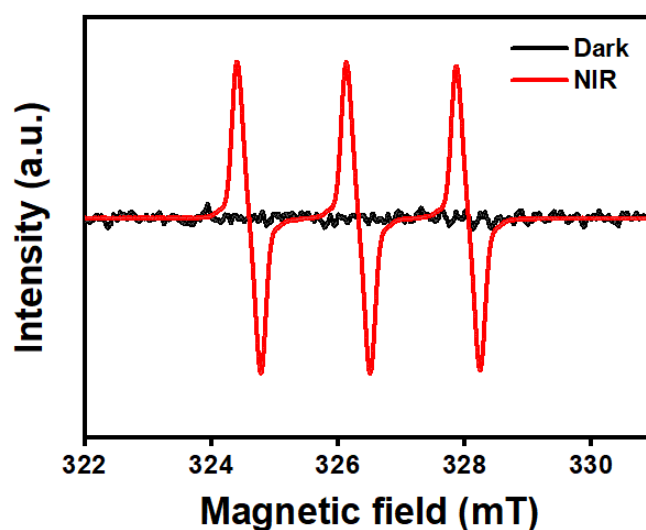

**Fig. S11** ESR spectra of ICG to detect <sup>1</sup>O<sub>2</sub> with (without) NIR irradiation.

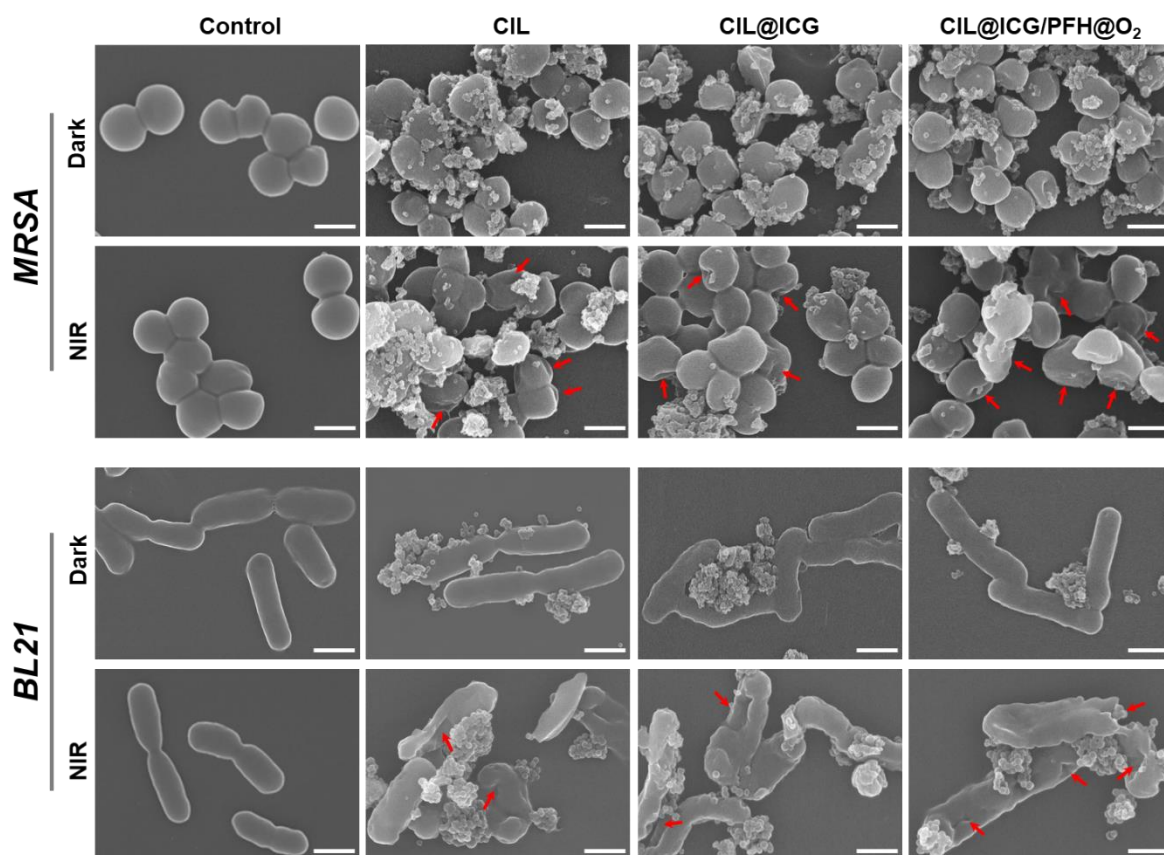

**Fig. S12** SEM images of MRSA and BL21 after different treatments. Laser irradiation conditions:  $1 \text{ W cm}^{-2}$ , 5 min. Scale bar:  $1 \mu\text{m}$ .

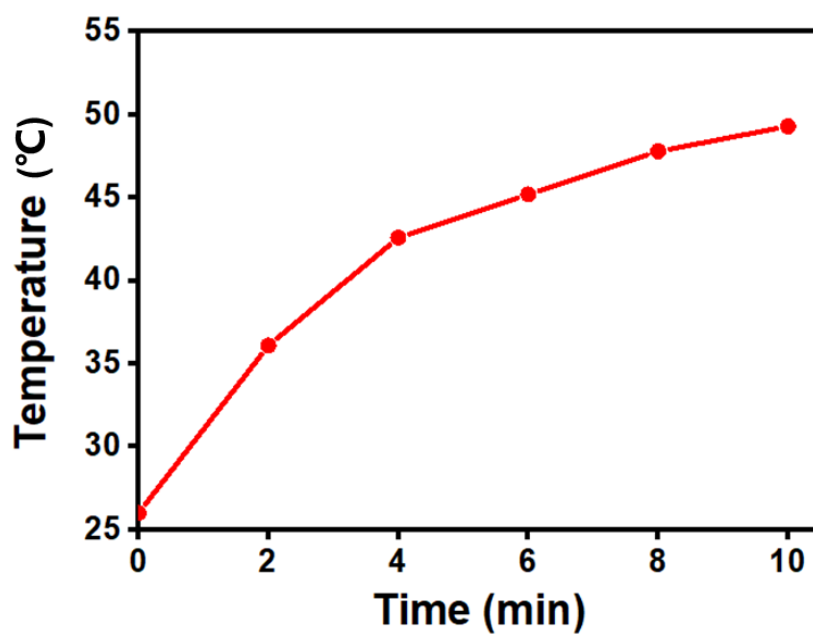

**Fig. S13** Temperature curve of a rat treated with CIL@ICG/PFH@O<sub>2</sub> (100  $\mu\text{g mL}^{-1}$ ) at different times under NIR irradiation for 10 min (808 nm,  $1 \text{ W cm}^{-2}$ ).

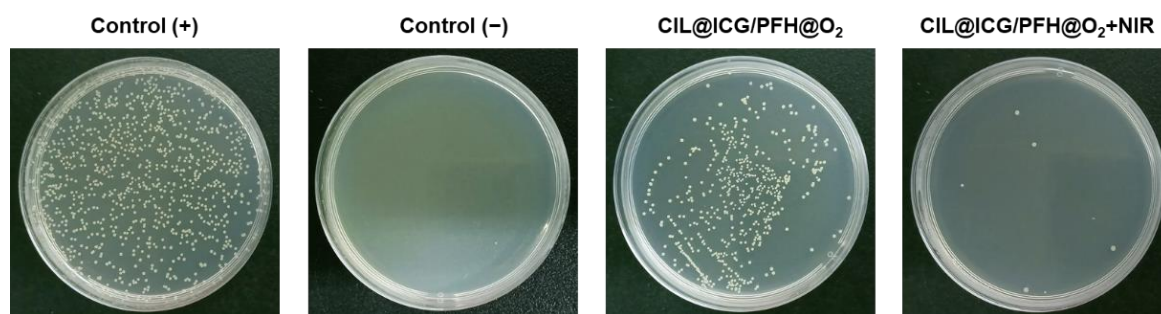

**Fig. S14** Photographs of bacterial cultures of wound tissue in different treatment groups on day

6.
